# Systematic review and meta-analysis of 50 years of coral disease research visualized through the scope of network theory

Luis M. Montilla<sup>1,\*</sup> , Alfredo Ascanio<sup>1</sup> , Alejandra Verde<sup>1</sup> , Aldo Croquer<sup>1</sup> ,

**1 Universidad Simón Bolívar. Caracas, Venezuela.**

\* [luismmontilla@usb.ve](mailto:luismmontilla@usb.ve)

## Abstract

Coral disease research encompasses five decades of undeniable progress. Since the first descriptions of anomalous signs, we have come to understand multiple processes and environmental drivers that interact with coral pathologies. To gain a better insight into the knowledge we already have, we explored how key topics in coral disease research have been related to each other using network analysis. We reviewed 719 papers and conference proceedings published from 1965 to 2017. From each study, four elements determined our network nodes: 1) studied disease(s); 2) host genus; 3) marine ecoregion(s) associated with the study site; and 4) research objectives. Basic properties of this network confirmed that there is a set of specific topics comprising the majority of research. The top five diseases, genera, and ecoregions studied accounted for over 48% of the research effort in all cases. The community structure analysis identified 15 clusters of topics with different degrees of overlap among them. These clusters represent the typical sets of elements that appear together for a given study. Our results show that while some coral diseases have been studied considering multiple aspects, the overall trend is for most diseases to be understood under a limited range of approaches, e.g. bacterial assemblages have been considerably studied in Yellow and Black band diseases while immune response has been better examined for the aspergillosis-*Gorgonia* system. Thus, our challenge in the near future is to identify and resolve potential gaps in order to achieve a more comprehensive progress on coral disease research.

## 1 Introduction

2 Coral diseases have been an important factor responsible for the decline of coral reefs in some  
3 areas in the last decades (Rogers and J. Miller 2013). Although pathogens and diseases are part  
4 of the natural dynamics of ecosystems, including coral reefs, the interaction with other stressful  
5 environmental factors aggravates their negative effects (Ban et al. 2014), enhancing important losses  
6 of live coral cover (Lewis et al. 2017; Precht et al. 2016; Randall and Woesik 2015). This loss of coral  
7 cover has been particularly important in the Caribbean, which has been frequently called a “coral  
8 disease hot spot” because of the number of diseases and the range of affected species in comparison  
9 with the low coral cover in the region (Bruckner 2002; Green and Bruckner 2000).

10 The evolution of this body of knowledge has been compiled and updated frequently in multiple  
11 narrative reviews (Goreau et al. 1998; Bourne et al. 2009; Antonius 1981; Green and Bruckner  
12 2000; Richardson 1998; Rosenberg and Ben-haim 2002; Santavy and Peters 1997; Weil et al. 2006;  
13 Woodley et al. 2015). However, quantitative approaches (e.g. meta-analyses, systematic reviews)  
14 that complement these publications have been less frequent. One example is the result provided  
15 by Work and Meteyer 2014, who examined almost 500 coral disease papers, and classified the  
16 used methods in terms of six broad categories. From their analysis they evidenced the scarcity  
17 of microscopical sign descriptions using histological techniques. In another example, Ward and

18 Lafferty 2004 analyzed the frequency of coral disease papers as a potential proxy of a coral diseases  
19 incidence. Finally, Ban et al. 2014 reviewed the experimental research about at least two stressors  
20 simultaneously using network theory. These types of syntheses, although scarce, provide important  
21 benefits over narrative reviews such as offering a wide and more objective perspective of the research  
22 landscape, integrating the trends in subfields of a discipline, and potentially identifying research  
23 gaps and opportunities for new questions to be explored (Lortie 2014).

24 Here we present a systematic review aimed at identifying groups of coral disease research topics  
25 that have been explored more frequently than others. To do this, we performed a network analysis  
26 approach. Network analysis is frequently used in systematic reviews (Borrett et al. 2014; Ohniwa  
27 et al. 2010) and allows researchers to address multiple issues in coral disease research, such as the  
28 evaluation of phage-bacteria interactions (Soffer et al. 2014) synergistic effects of environmental  
29 stressors (Ban et al. 2014), the analysis of microbial positive and negative interactions in healthy  
30 and diseased conditions (Sweet and Bulling 2017; Meyer et al. 2016), and the analysis of gene  
31 expression and regulation (Wright et al. 2015). We hypothesized that if the research topics typically  
32 addressed in coral research lack uniformity among several key aspects of epizootiology, then a  
33 network representing the co-occurrence of these topics in coral disease research papers would exhibit  
34 a community structure, where the communities (also called clusters) of nodes would represent the  
35 different themes that have characterized most of coral disease research in the last 50 years.

## 36 Methods

### 37 Data acquisition

38 We reviewed a total of 719 publications spanning a period from 1969 to 2017. We looked for these in  
39 the search engines and databases *Google scholar*, *Meta*, and *Peerus*, using combinations of keywords  
40 with search modifiers, including “coral disease”, “syndrome”, “yellow”, “black”, “purple”, “spot”,  
41 “band”, “pox”, “dark”, “plague”, “growth”, “trematode”, “anomalies”, “ciliate”, “soft coral”, and  
42 “aspergillosis”. This included peer-reviewed papers and conference proceedings, since the latter would  
43 also provide information about research questions explored in a given time and a given location.  
44 We excluded thesis, preprints, and book chapters. Additionally, we compared our database with  
45 the list of papers analyzed by Work and Meteyer 2014 looking for potential omissions. The papers  
46 were included if the research question directly addressed some biological or ecological aspect of coral  
47 diseases or coral pathogens (figure 1). The comprehensive list of papers included in our analysis  
48 is provided as supplementary material (Supp. 1). For every paper, we assessed four fundamental  
49 questions, each one corresponding to one node category:

- 50 • **What was the studied disease?** Each disease was listed as an individual node and the  
51 cases where there was no specific disease of interest (e.g. general surveys), we assigned the node  
52 “multiple diseases”. Additionally, we classified “White Syndrome” as all the descriptions of  
53 pathologies involving tissue loss from the Pacific *sensu* (Bourne et al. 2015). We applied similar  
54 criteria and classified “Pink syndrome” as the references to Pink spots, Pink line syndrome,  
55 Pink-Blue syndrome, and Pink-Blue spot syndrome, as these diseases have not been clearly  
56 distinguished from one another. We excluded papers specifically concerning thermally-induced  
57 bleaching but included the node “bleaching effects” for papers investigating the effects of  
58 bleaching over some disease topic or vice versa.
- 59 • **Where did the samples come from? Or where was the study conducted?** We  
60 reported the corresponding marine ecoregion *sensu* (Spalding et al. 2007). When no explicit  
61 sampling site was stated, we contacted the respective authors to verify the location.
- 62 • **What was the genus of the affected host?** If the study implicated multiple specific  
63 genera, each one was listed as an individual node. In the cases of baselines and similar studies  
64 which lacked specific taxa of interest, we assigned the node “multiple genera”.

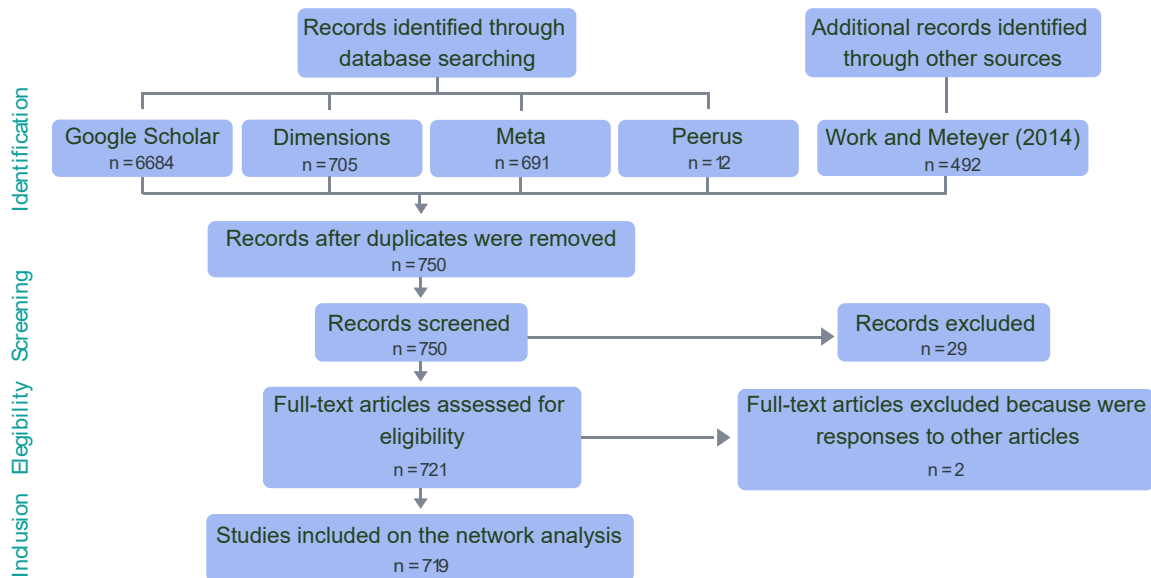

**Figure 1.** PRISMA flow diagram for coral disease papers included in the network analysis.

- 65 • **What were the objectives of the study?** We specifically looked into the questions or  
66 specific objectives addressed in the introduction section of the papers and assigned a set of  
67 keywords. Each keyword represented one node in the network. The complete list of key-  
68 words (Supp. 2) is included as a supplementary file at [https://github.com/luismmontilla/](https://github.com/luismmontilla/CoDirNet/tree/master/supplementary)  
69 [CoDirNet/tree/master/supplementary](https://github.com/luismmontilla/CoDirNet/tree/master/supplementary).

70 Two of the authors (see author contributions) performed the assignation of nodes to each  
71 study, and in the case of disagreements, all the authors were consulted until a consensus was  
72 reached.

## 73 Network construction and community structure analysis

74 Using the extracted topics as vertices and their co-occurrence in a given paper as the edges, we  
75 built an undirected weighted network. The weight  $w_{ij}$  was the frequency of co-occurrence of the  
76 keywords  $i$  and  $j$  in the same article (Fig. 2). The network was constructed and analyzed using the  
77 R package *igraph* (Csardi and Nepusz 2006; R Core team 2016). Considering the size and complexity  
78 of the resulting graph, we used the network reduction algorithm proposed by Serrano et al. 2009,  
79 implemented in the package *disparityfilter* for R (Bessi 2015) to extract the backbone of our network.  
80 This resulted in a smaller graph that retains the multiscale properties of the original network.

81 Next, we used the link communities approach (Ahn et al. 2010) to obtain groups of nodes forming  
82 closely connected groups (hereafter, referred as communities), using the *linkcomm* package (Kalinka  
83 and Tomancak 2011). With this method overlapping communities may appear, which allows for  
84 several nodes to be part of multiple communities (the scripts for the used functions with their  
85 modifications are available at <https://github.com/luismmontilla/CoDirNet>. We explored the  
86 similarity among the obtained communities, representing them as a new network of communities  
87 where each community was a node, and the edges had the value of the Jaccard coefficient for  
88 the number of shared nodes (hence, communities without shared topics would be disconnected).  
89 Additionally, we used the community centrality (Kalinka and Tomancak 2011) as a measure of the  
90 importance of each node within their respective communities.

91 To test the statistical robustness of the obtained communities, we measured the communities  
92 assortativity ( $r_{com}$ ) using a modification of the method proposed by Shizuka and Farine (2016). In  
93 our case, this metric measures a proportion of derived replicates (permuting the network edges)  
94 that result in the same community structure as the network derived from the original data. The

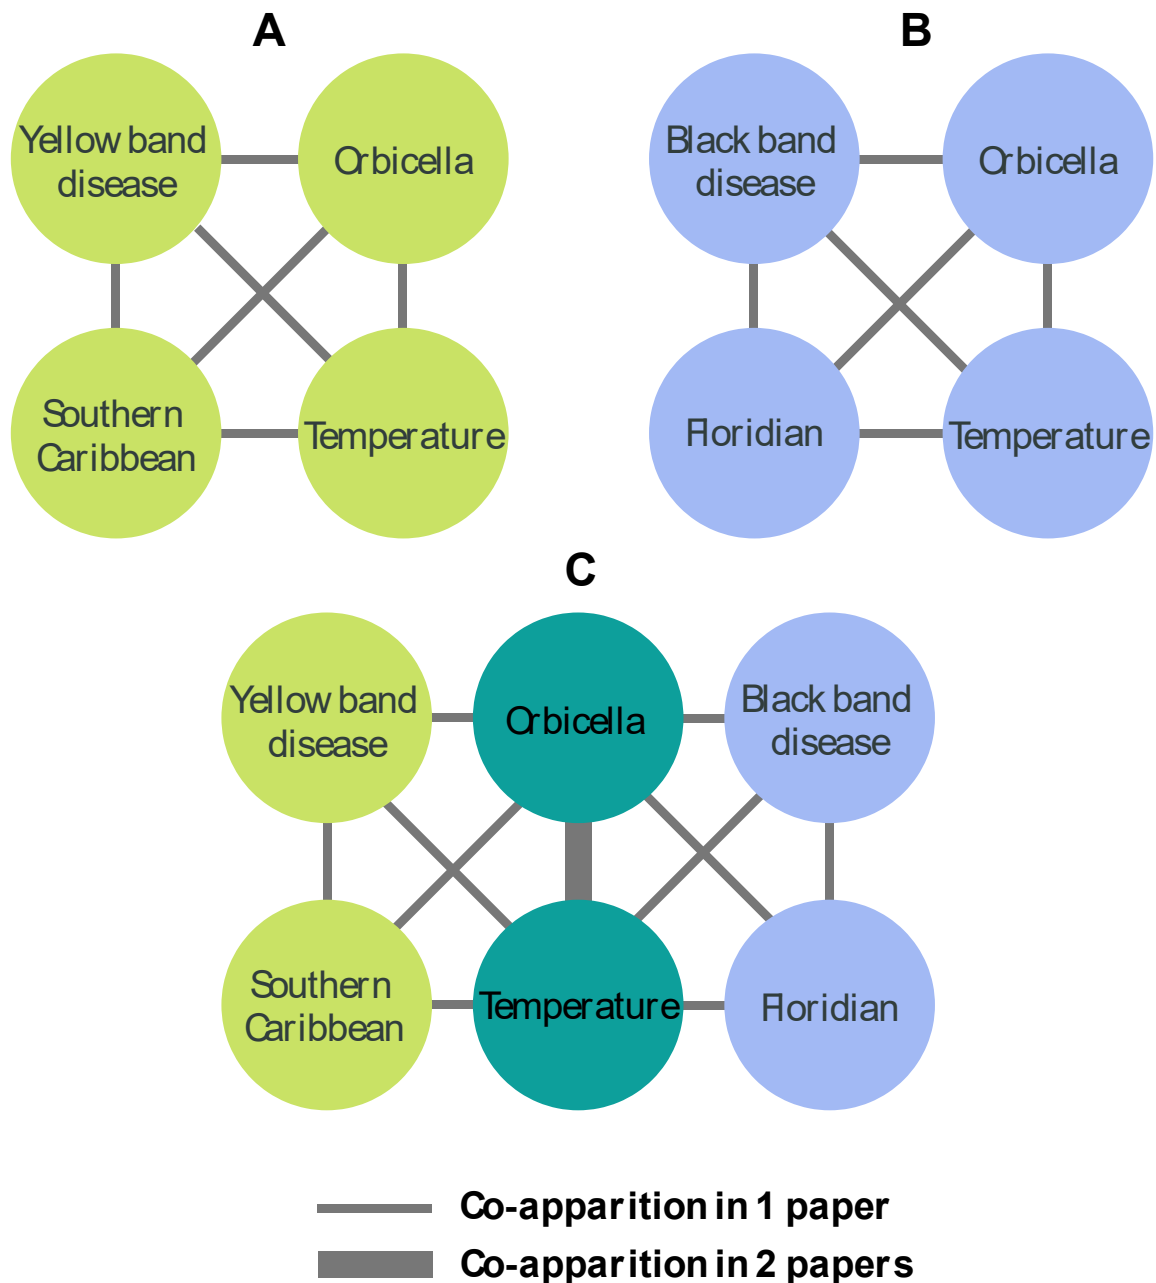

**Figure 2.** Network construction. **A** represents a hypothetical paper focusing on the effect of temperature on Yellow Band Disease in a country of the Southern Caribbean. Each paper produces a fully connected graph. In **B**, a second hypothetical paper generates its own graph, which has a link between *Orbicella* and 'Temperature' in common with **A**. **C** represents the resulting network, with the link between *Orbicella* and 'Temperature' representing the co-appearance in two papers and the remaining links representing one paper.

**Table 1.** Top five topics addressed in the coral disease research literature

| Category  | Topic                    | Frequency (%) |
|-----------|--------------------------|---------------|
| Disease   | Black band disease       | 17.1          |
|           | White syndromes          | 14.2          |
|           | White plague             | 6.4           |
|           | Yellow band disease      | 5.6           |
|           | Growth anomalies         | 5.4           |
|           | <b>Total</b>             | <b>48.7</b>   |
| Genus     | <i>Acropora</i>          | 16.3          |
|           | <i>Orbicella</i>         | 12.0          |
|           | <i>Porites</i>           | 9.5           |
|           | <i>Montipora</i>         | 7.6           |
|           | <i>Gorgonia</i>          | 7.4           |
|           | <b>Total</b>             | <b>52.8</b>   |
| Ecoregion | Floridian                | 15.9          |
|           | Eastern Caribbean        | 9.3           |
|           | Greater Antilles         | 9.2           |
|           | Central and Southern GBR | 8.6           |
|           | Hawaii                   | 7.6           |
|           | <b>Total</b>             | <b>50.6</b>   |
| Objective | Prevalence/incidence     | 23.5          |
|           | Spatial patterns         | 13.1          |
|           | Sign descriptions        | 11.8          |
|           | Transmission             | 10.0          |
|           | Temperature              | 9.9           |
|           | <b>Total</b>             | <b>68.3</b>   |

95 coefficient is a value ranging from -1 to 1, where values closer to 0 indicate that the community  
 96 structure in the network of interest differed from the communities obtained in random permutations;  
 97 values close to 1 indicate that the permuted networks have similar node communities as the original  
 98 network; and values close to -1 indicate that the communities of the permutation-derived replicates  
 99 are formed by different nodes in contrast with the original network. We used a modification  
 100 (hereafter  $r_{oc}$ ) that allows the use of this coefficient for overlapping communities (code available at  
 101 <https://github.com/alspeed09/OverlapCommAssortativity>).

## 102 Results

103 The content of all the 719 coral disease papers yielded a network comprising 302 vertices and 4184  
 104 edges. The strength distribution (i.e. the distribution of the sum of all connections to the nodes)  
 105 revealed that the coral disease research network, like other natural networks, presented a highly  
 106 skewed distribution, where most research topics share few connections and a comparatively small  
 107 group of topics are heavily represented in scientific publications. This pattern persisted for the  
 108 specific distribution of each type of nodes, suggesting that over the past 50 years, coral disease  
 109 research has focused on a reduced number of questions in each category (figure 3).

110 Considering this, we explored the identity of the five most represented topics in each case. For  
 111 all the categories, five topics accounted for over 40% of the total frequency of apparition in all the  
 112 examined papers (table 1). We show that the evaluations of prevalence and/or incidence have had a  
 113 prominent place in research, together with other questions about the spatial patterns, transmission,  
 114 and descriptions of the signs (mostly visual but also histological descriptions) of diseases. The role  
 115 of temperature stress had also received priority in comparison with other environmental drivers.

116 After applying the disparity filter, the initial network was reduced to 93 vertices and 233 edges.

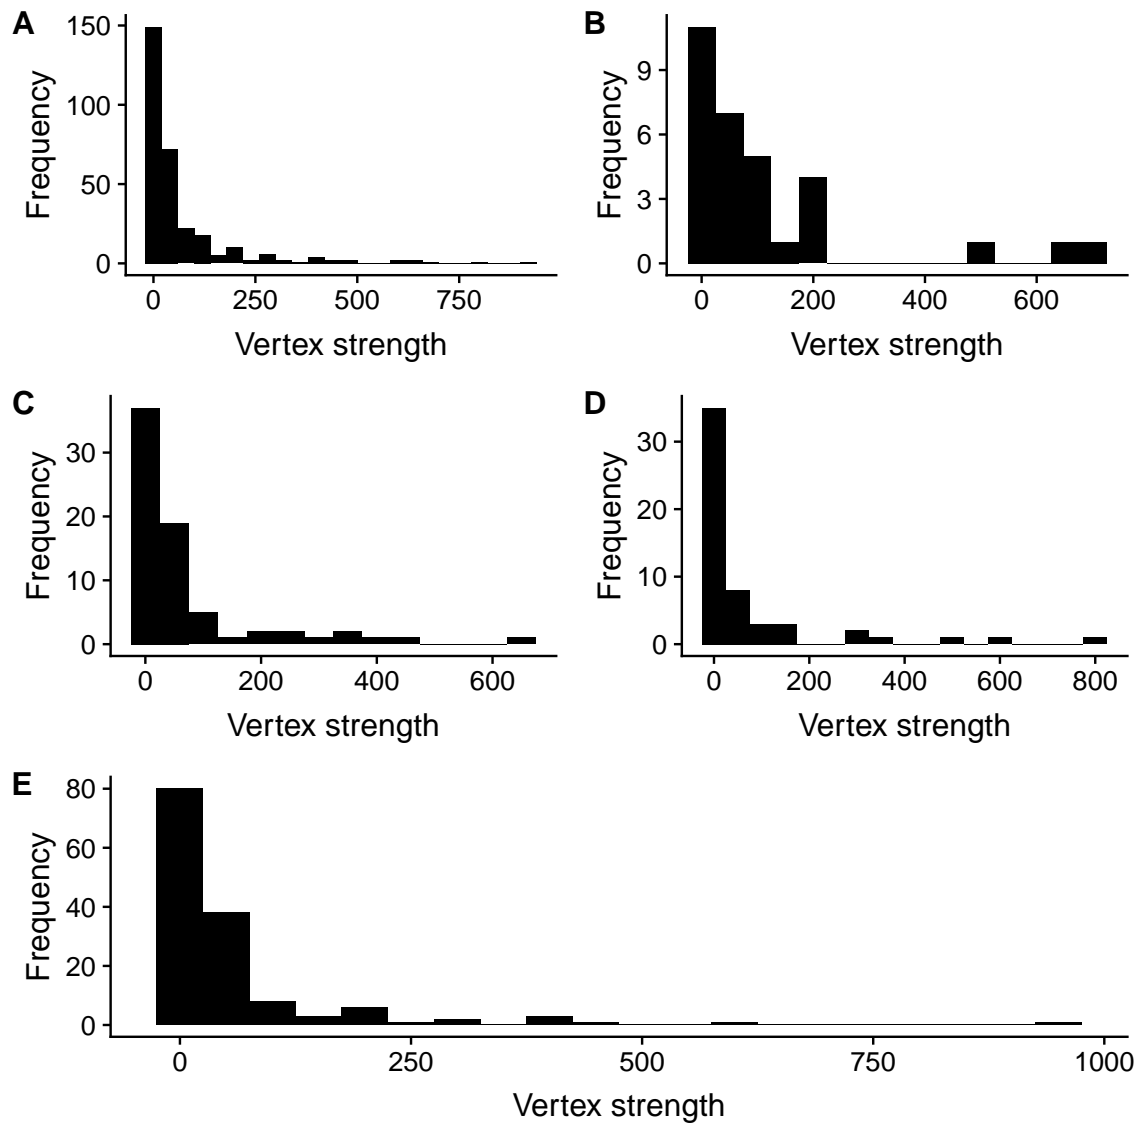

**Figure 3.** Strength distributions for A) the global network, B) Disease nodes, C) Ecoregion nodes, D) Genus nodes, and E) Objective nodes.

117 The set of excluded research questions were included as supplementary material (Supp. 3) at  
118 <https://github.com/luismmontilla/CoDiRNet>. These excluded topics either encompass a set of  
119 highly-specific questions being scarcely explored (e.g. diseases on mesophotic corals, the effects of  
120 ocean acidification, or the role of commensal bacteria) or new questions altogether.

121 From the reduced network, we obtained a total of 15 node communities (hereafter, referred  
122 as C1 to C15). We obtained a  $r_{oc}$  value of 0.23, indicating that the network effectively possess a  
123 community structure that departs from randomness. These groups ranged from small communities  
124 with low overlap, to rich and highly interconnected communities, e.g. C5 and C14 shared almost  
125 50% of their members (figure 4).

126 The smaller communities were composed of six or less nodes. C3 represented four topics related  
127 to questions about temporal patterns; C6 represented four genera typically affected by Dark Spot  
128 Disease; C8 was comprised of studies dealing with stress temperature and zooxanthellae damage in  
129 the Great Barrier Reef and nearby locations. C9 showed that an important group of studies related  
130 to White Band Disease have been focused in determining the advance rate, transmission patterns,  
131 and usually a description of the signs. C10 included the effects of environmental factors on diseased  
132 and bleached corals (figure 5).

133 The medium-sized communities offered more clear pictures of several trends prevailing in the  
134 coral disease research. C1 was an *Acropora*-centered community. This included topics related to  
135 the descriptions of signs, bacterial assemblages, transmission mechanisms and pattern of several  
136 affections like White Syndromes, White Pox, and Brown Band Disease, in the Great Barrier Reef.  
137 C7 included studies around Caribbean Yellow band Disease, mostly about changes in the microbial  
138 community, and also temporal and spatial patterns of the disease. C11 was a community constituted  
139 by studies about *Vibrio* as a coral pathogen, especially infecting the genera *Oculina*, *Montipora*,  
140 and *Pocillopora*. C13 was a community that incorporated two research trends. The most important  
141 node in this community was White Syndrome, associated to topics like pathogen characterization,  
142 transmission experiments, and changes in bacterial assemblages of the hosts. These hosts were  
143 mainly *Montipora* and *Porites*, which were the connection to the second group: research about  
144 growth anomalies and trematode infections in Hawaii. C15 was a community centered on gorgonian  
145 affections and immune processes (figure 6.)

146 All the large communities (nodes > 5) had two nodes in common: Black Band Disease and  
147 Southern Caribbean, and both topics had large values of community centrality (5 and 5.8 respectively).  
148 C2 was the most specific one, including objectives related to Black Band Disease only. C4 also  
149 included Yellow Band Disease and White Plague, in this case encompassing studies dealing with  
150 transmission experiments, effects of temperature and changes in the associated microbiota. C5 was  
151 a community covering reviews, meta-analysis, baseline studies, and outbreaks reports. C12 was very  
152 similar to C4, with the distinction of including studies about White Pox, pathogen characterization,  
153 particularly *Serratia marscescens*, pathogen metabolites, and the Bahamian ecoregion. C14 consisted  
154 of several topics shared with C5, with the particular difference of including studies on *Acropora* and  
155 White Syndromes (figure 7).

## 156 Discussion

157 The network approximation used in this study for analyzing the relationships between coral disease  
158 research topics provided a quantitative perspective on the intensity of the research and the extension  
159 of the field so far. The communities obtained summarized the dominant trends (considering the bulk  
160 of the historical research), with each community corresponding to the themes of interest that have  
161 accumulated most of the published papers up to 2017. It is important to notice that we expected  
162 at least a minimal community structure to arise in our network, for some diseases affect only a  
163 specific set of coral genera and in certain regions. However, our hypothesis was that the patterns of  
164 addressed questions would also contribute to the apparition of multiple communities in our network.

165 Our results display some clear patterns. For example, Black Band Disease occupies a preponderant  
166 place in coral disease research as the most connected disease that also appears in most communities



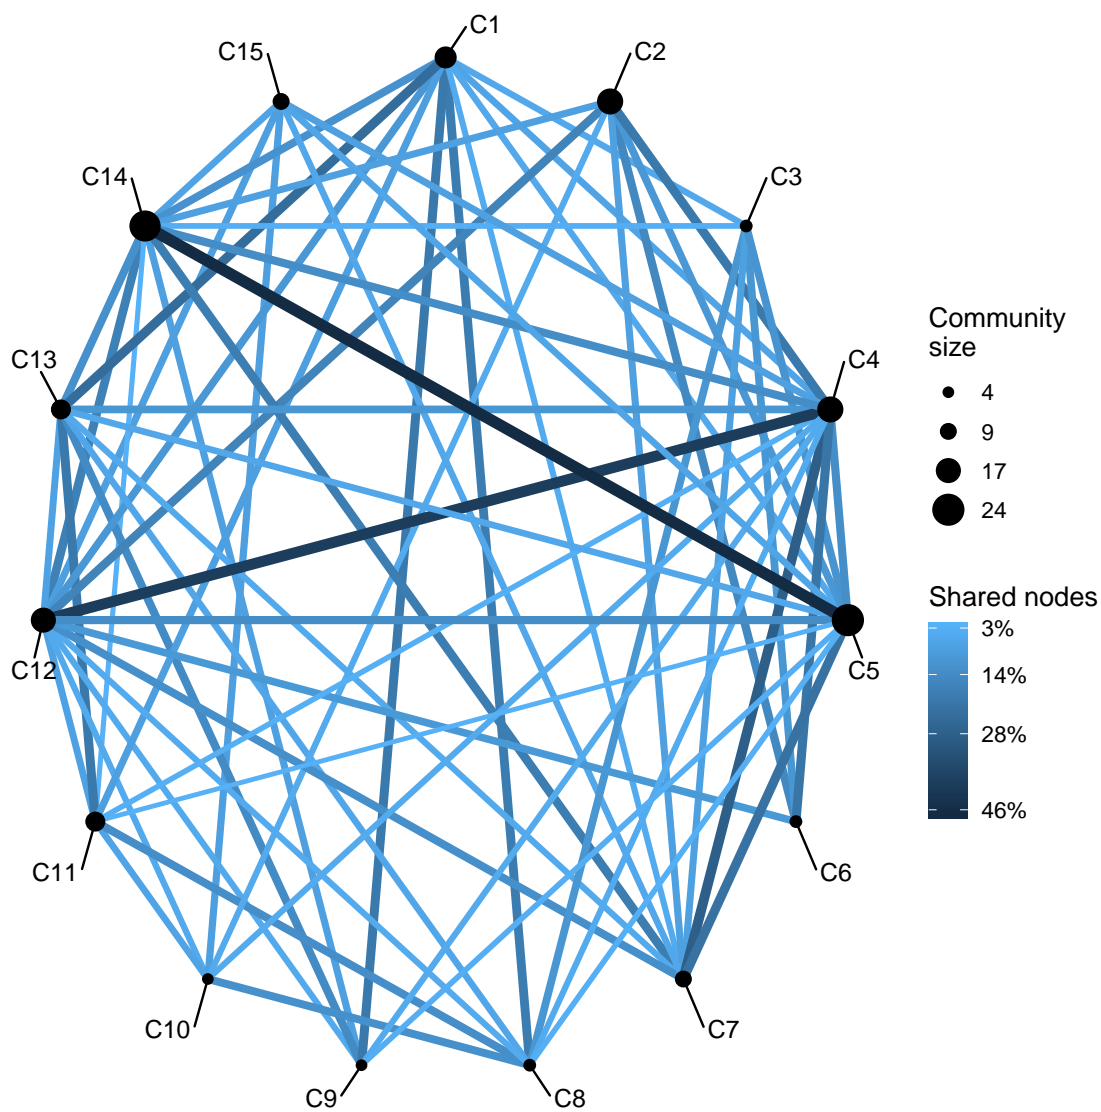

**Figure 4.** Similarity network of 15 communities. Node size represents the number of topics in each community, and edge width represents the similarity between two given communities.



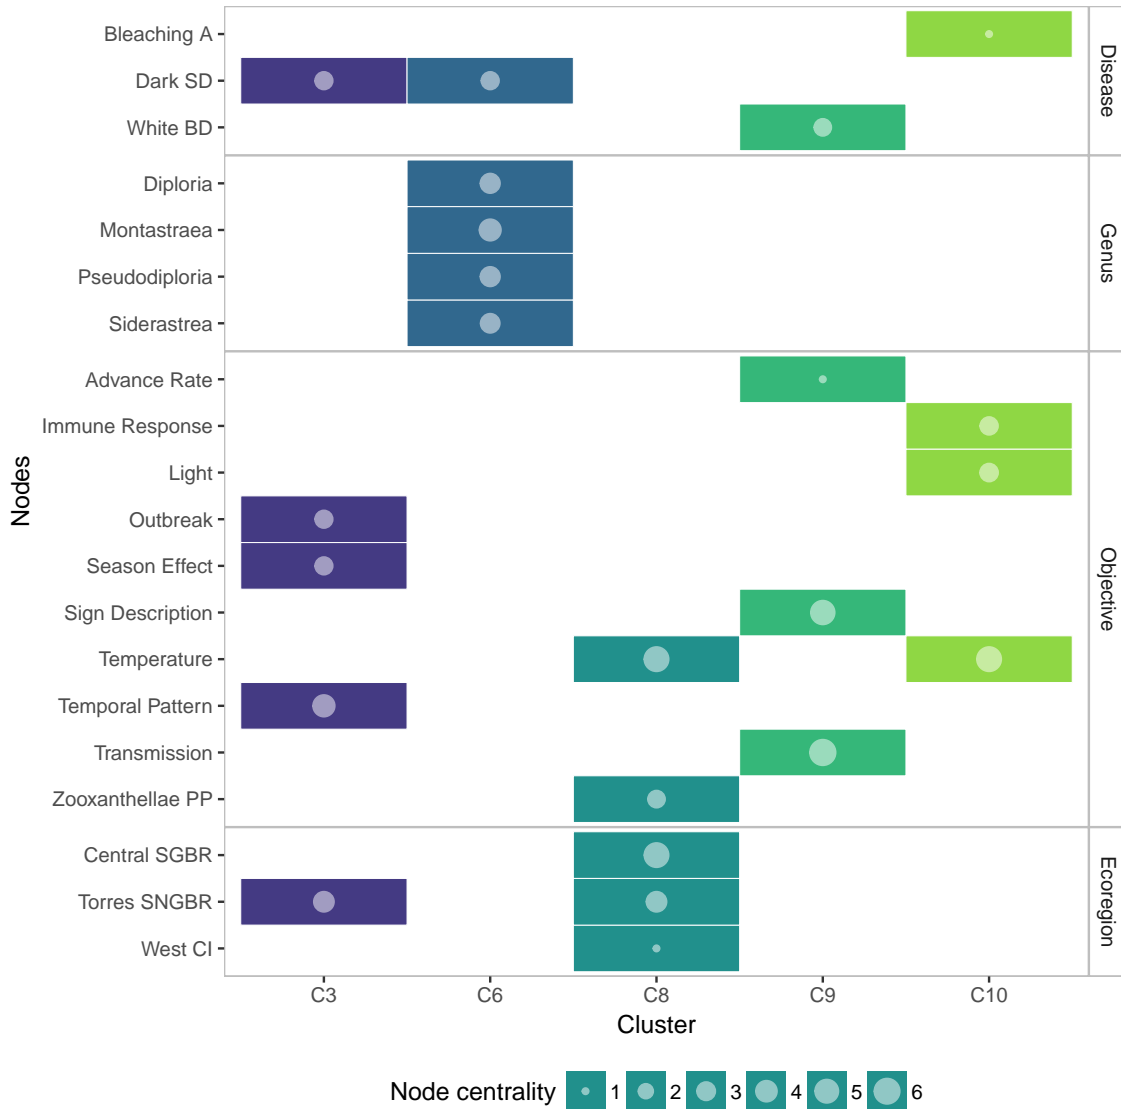

**Figure 5.** Membership matrix of communities C3, C6, C8, C9, and C10. Each column represents a different community and the rows indicate the membership of a given topic to one or multiple communities. E.g. Topics in C9 belong exclusively to this community while the topic Dark Spot Disease belong to two different communities. Circle size represents the importance of the topic within a community, measured as overall node centrality.

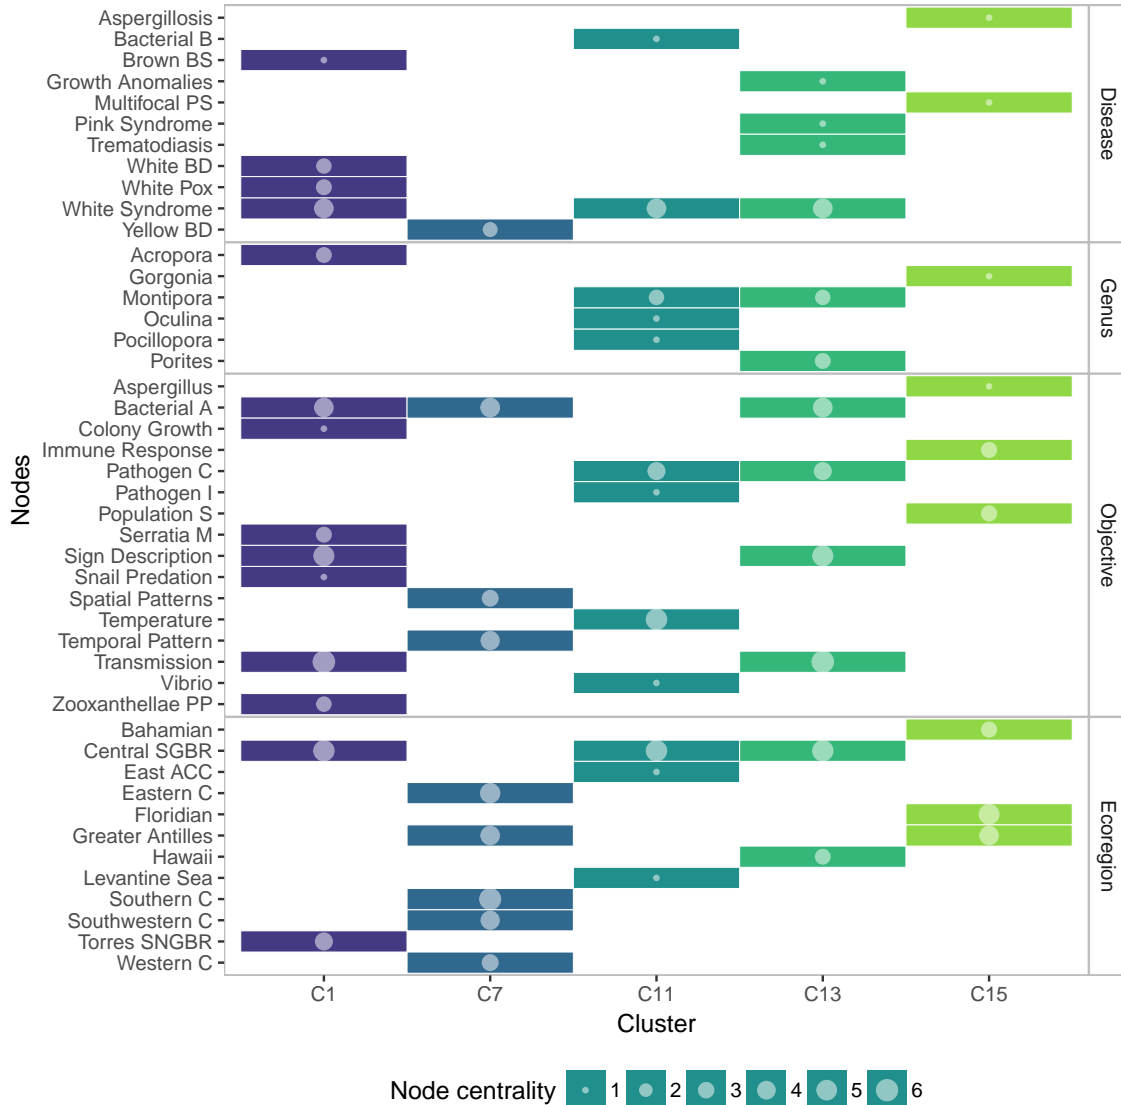

**Figure 6.** Membership matrix of communities C1, C7, C11, C13, and C15. Each column represents a different community and the rows indicate the membership of a given topic to one or multiple communities. Circle size represents the importance of the topic within a community, measured as overall node centrality.

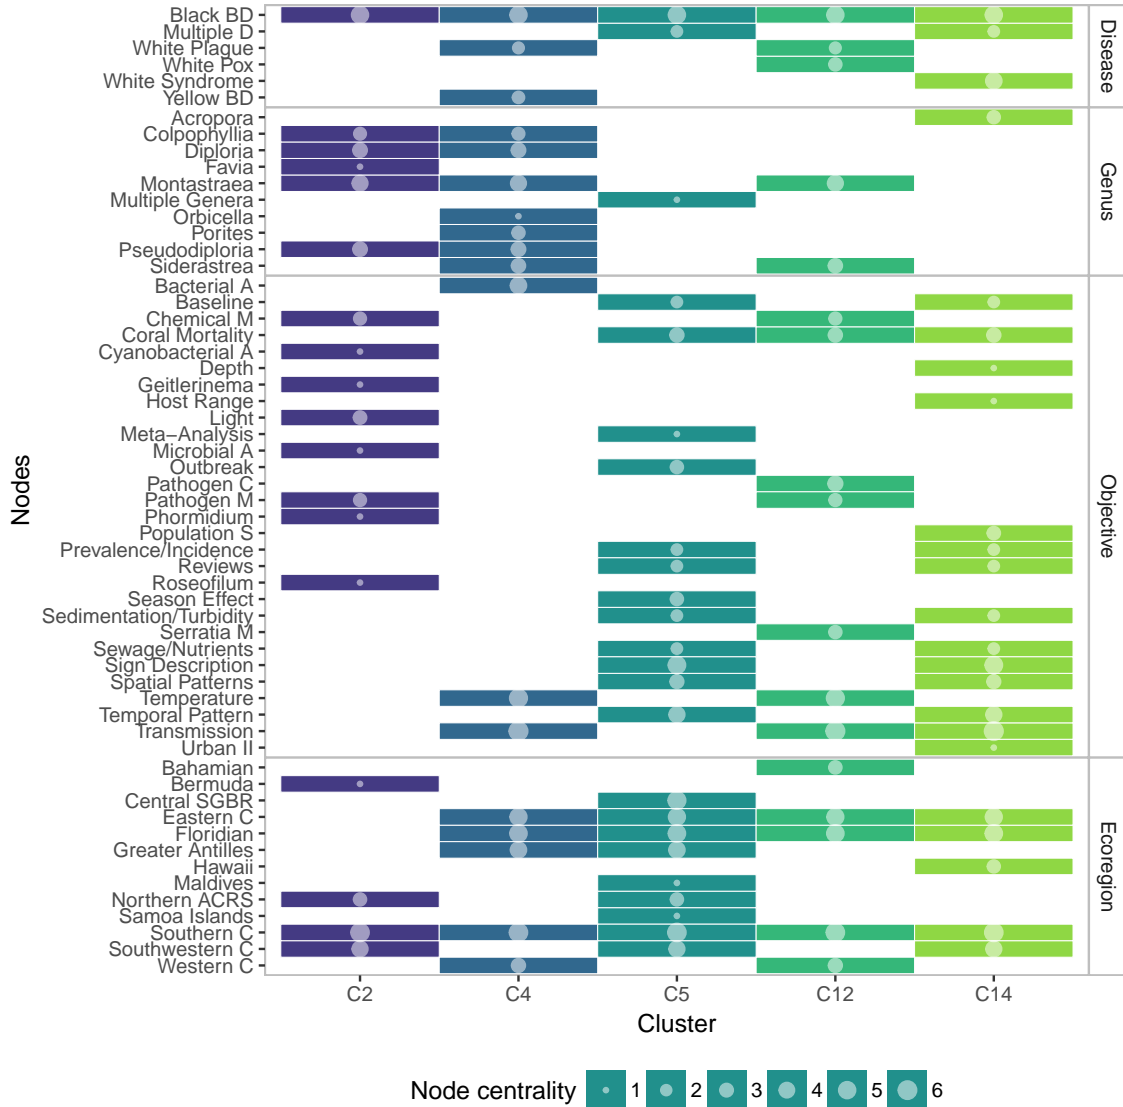

**Figure 7.** Membership matrix of communities C2, C4, C5, C12, and C14. Each column represents a different community and the rows indicate the membership of a given topic to one or multiple communities. Circle size represents the importance of the topic within a community, measured as overall node centrality.

167 with the highest centrality. There are several reasons contributing to this. Black Band Disease  
168 infection has been studied since the emergence of the field (Antonius 1976; Garrett and Ducklow  
169 1975) and it has consistently accumulated a body of knowledge that makes it the most studied coral  
170 disease so far. Its effects comprise a substantial number of coral hosts across different ecoregions and  
171 produce extensive mortality during disease epizootics (Diraviya Raj et al. 2016; Aeby et al. 2015;  
172 Yang et al. 2014; Sato et al. 2009; Hobbs et al. 2015), especially when combined with seasonal or  
173 anomalous temperature increases and determined light conditions (Chen et al. 2017; Lewis et al.  
174 2017; Bhedi et al. 2017; A. W. Miller and Richardson 2015; Kuehl et al. 2011; Sato et al. 2011;  
175 Boyett et al. 2007). Additionally, there have been important advances in the field derived from  
176 studies about this disease. Studies about the pathobiome of Black Band Disease pioneered the  
177 concept of pathogenic consortia as etiological agents of coral diseases (Carlton and Richardson 1995),  
178 and the accumulated findings are allowing the proposal of etiological models (Sato et al. 2016).  
179 In contrast, other diseases have been important enough to appear in their own communities, but  
180 they have been associated with less diverse research themes. For example, Caribbean Yellow Band  
181 Disease has been studied mostly around the changes in its microbial assemblages, and soft coral  
182 Aspergillosis studies usually deal with immune processes; in both cases the number of objectives is  
183 similar or lower to the number of ecoregions, implying that research have been extended to different  
184 regions but the same set of questions remain.

185 Our findings also highlight the historical importance of environmental stressors for a broad number  
186 of diseases. In our network, temperature was consistently associated with several communities, and  
187 the role of sedimentation, turbidity, and nutrient loads (including input through sewage waters) were  
188 the main environmental factors associated with baseline studies, appearing with high centrality and,  
189 particularly temperature, in communities of all sizes. This was consistent with a previous review  
190 where the authors found that temperature was the most frequently studied environmental variable  
191 in their sample, along with sedimentation, both variables having high influence over coral diseases  
192 (Ban et al. 2014).

193 This contribution complements previous narrative reviews (*sensu* Lortie 2014; Petticrew 2001;  
194 Morais et al. 2018) about coral diseases; the previously mentioned low-to-mid topic diversity  
195 communities together with the list of topics excluded from the backbone network and the list of  
196 non-existing links (Supp. 4) can be used as a reference of questions, locations, or affected genera in  
197 different coral diseases that could be tackled in future research, especially if we aim to fill existing  
198 gaps or strengthen existing but poorly explored processes related to coral diseases.

199 For example, research about coral immunity has been steadily progressing, however, there is  
200 so much room for exploration if we consider that the use of specific approaches can be tested on  
201 different coral diseases. For instance, topics like 'gene expression' and 'protein expression' were  
202 excluded from the backbone, probably because they represent emergent perspectives, but there  
203 are examples of the application of these methods like immune-related transcriptomic profiles that  
204 have been developed for Yellow Band Disease (Anderson et al. 2016), Growth Anomalies (Frazier  
205 et al. 2017), and White Band Disease (Libro et al. 2013), while other diseases remain to be explored  
206 from this approach. Additionally, the research about coral immunity can be extended when we take  
207 into consideration traits like susceptibilities ranges to environmental stress and diseases and the  
208 complex symbiotic interactions that constitute the coral holobiont (Palmer 2018), increasing the  
209 attention not only to the identity of the microbial assemblage members but also to their functional  
210 role in the holobiont. In this sense, in our backbone network, two topics associated to zooxanthellae  
211 ('zooxanthellae photosynthetic performance', and 'zooxanthellae damage') were mostly associated to  
212 four diseases, and the topic 'functional structure' was excluded from the backbone.

213 The knowledge about coral disease interactions with environmental stressful conditions can  
214 also be widely expanded if we increase the attention to other variables or their interactions with  
215 some better studied ones. The role of high temperatures has been the main environmental driver  
216 addressed, in coral research, however there are other conditions that have been explored in a few  
217 papers like changes in water pH (Muller et al. 2017; Stanić et al. 2011; Remily and Richardson 2006),  
218 dissolved oxygen (Remily and Richardson 2006), and other better studied like the role of nutrient  
219 enrichment (Kaczmarzky and Richardson 2011; Vega-Thurber et al. 2014; Voss and Richardson 2006;

220 Bruno et al. 2003; Looney et al. 2010) whose potentially interactive effects with temperature and  
221 diseases remain far less explored.

222 Other relevant aspect of this field that can be improved in the future is the incorporation of  
223 open science practices, making available annotated coral disease specific datasets—represented in  
224 our network as the 'database' topic—e.g. Caldwell et al. 2016, Burns et al. 2016, or the Global  
225 Coral Disease Database (<http://gcdd.tinypla.net/>), especially considering that we found the  
226 topic 'baseline' as an important node in the network but most of this data is not freely available,  
227 and it would represent an invaluable resource for further analysis.

228 In summary, we obtained a generalized representation of the most explored topics in coral disease  
229 research, however, these predominant themes and questions are yet to be generalized to the range of  
230 potential coral hosts and their diseases. We expect that future revisions using this approach will  
231 find better connected communities as consequence of studying every disease from a broader range of  
232 research objectives. Future analysis of this data set will include additional data on coral immunity  
233 and a more detailed analysis of the temporal trends of the field.

## 234 Acknowledgments

235 We wish to thank Laurie Richardson, Longin Kaczmarek, and Mike Sweet for the information  
236 provided. Also Stuart Sandin, Mark Vermeij, Eugenia Sanchez, Bill Gowacki, and Kourtney Barber  
237 for their comments on an early manuscript.

## References

- Aeby, Greta Smith, Thierry M. Work, Christina M Runyon, Amanda Shore-Maggio, Blake Ushijima, Patrick Videau, Silvia Beurmann, and Sean M. Callahan (2015). "First Record of Black Band Disease in the Hawaiian Archipelago: Response, Outbreak Status, Virulence, and a Method of Treatment". *Plos One* 10.3, e0120853. DOI: 10.1371/journal.pone.0120853.
- Ahn, Yong-Yeol, James P. Bagrow, and Sune Lehmann (2010). "Link communities reveal multiscale complexity in networks". *Nature* 466.7307, pp. 761–764. DOI: 10.1038/nature09182.
- Anderson, David A., Marcus E. Walz, Ernesto Weil, Peter Tonellato, and Matthew C. Smith (2016). "RNA-Seq of the Caribbean reef-building coral *Orbicella faveolata* (Scleractinia-Merulinidae) under bleaching and disease stress expands models of coral innate immunity". *PeerJ* 4, e1616. DOI: 10.7717/peerj.1616.
- Antonius, Arnfried (1976). "New observations on coral destruction in reefs". *10th Meeting of the Association of Island Marine Laboratories of the Caribbean*. Mayagüez, Puerto Rico.
- (1981). "Coral reef pathology: a review". *Proceedings of the 4th International Coral Reef Symposium*. Manila, pp. 3–6.
- Ban, Stephen S., Nicholas A J Graham, and Sean R. Connolly (2014). "Evidence for multiple stressor interactions and effects on coral reefs". *Global Change Biology* 20.3, pp. 681–697. DOI: 10.1111/gcb.12453.
- Bessi, Alessandro (2015). *disparityfilter: Disparity Filter Algorithm of Weighted Network*.
- Bhedi, Chinmayee D, Carson W Prevatte, Maggie S Lookadoo, Patricia A Waikel, Patrick M Gillevet, Masoumeh Sikaroodi, Shawn R Campagna, and Laurie L. Richardson (2017). "Elevated temperature enhances short to medium chain acyl homoserine lactone production by Black Band Disease associated vibrios". *FEMS Microbiology Ecology* 93.January, pp. 1–12. DOI: 10.1093/femsec/fix005.
- Borrett, Stuart R., James Moody, and Achim Edelman (2014). "The rise of Network Ecology: Maps of the topic diversity and scientific collaboration". *Ecological Modelling* 293, pp. 111–127. DOI: 10.1016/j.ecolmodel.2014.02.019. arXiv: 1311.1785.
- Bourne, David G., Tracy D. Ainsworth, F. Joseph Pollock, and Bette L. Willis (2015). "Towards a better understanding of white syndromes and their causes on Indo-Pacific coral reefs". *Coral Reefs* 34.1, pp. 233–242. DOI: 10.1007/s00338-014-1239-x.

- Bourne, David G., Melissa Garren, Thierry M. Work, Eugene Rosenberg, Garriet W. Smith, and C. Drew Harvell (2009). “Microbial disease and the coral holobiont”. *Trends in Microbiology* 17.12, pp. 554–562. DOI: 10.1016/j.tim.2009.09.004.
- Boyett, Holly V, David G. Bourne, and Bette L. Willis (2007). “Elevated temperature and light enhance progression and spread of black band disease on staghorn corals of the Great Barrier Reef”. *Marine Biology* 151.5, pp. 1711–1720. DOI: 10.1007/s00227-006-0603-y.
- Bruckner, Andrew W (2002). *Priorities for effective management of coral diseases*. US Department of Commerce, National Oceanic and Atmospheric Administration, National Marine Fisheries Service.
- Bruno, John F, Laura E Petes, C. Drew Harvell, and Annaliese Hettinger (2003). “Nutrient enrichment can increase the severity of coral diseases”. *Ecology Letters* 6.12, pp. 1056–1061. DOI: 10.1046/j.1461-0248.2003.00544.x.
- Burns, John H.R., Theodore Alexandrov, Katya Ovchinnikova, Ruth D. Gates, and Misaki Takabayashi (2016). “Data for spatial analysis of growth anomaly lesions on *Montipora capitata* coral colonies using 3D reconstruction techniques”. *Data in Brief* 9, pp. 460–462. DOI: 10.1016/j.dib.2016.09.009.
- Caldwell, Jamie M., John Henrik Robert Burns, Courtney S Couch, Megan Ross, Christina M Runyon, Misaki Takabayashi, Bernardo Vargas-Ángel, William Walsh, Maya Walton, Darla White, Gareth Williams, and Scott F. Heron (2016). “Hawaii Coral Disease database (HICORDIS): species-specific coral health data from across the Hawaiian archipelago”. *Data in Brief* 8, pp. 1054–1058. DOI: 10.1016/j.dib.2016.07.025.
- Carlton, Richard G and Laurie L. Richardson (1995). “Oxygen and sulfide dynamics in a horizontally migrating cyanobacterial mat: Black band disease of corals”. *FEMS Microbiology Ecology* 18.2, pp. 155–162. DOI: 10.1016/0168-6496(95)00052-C.
- Chen, Carla C.M., David G. Bourne, Christopher C. Drovandi, Kerrie Mengersen, Bette L Willis, M. Julian Caley, and Yui Sato (2017). “Modelling environmental drivers of black band disease outbreaks in populations of foliose corals in the genus *Montipora*”. *PeerJ* 5.1, e3438. DOI: 10.7717/peerj.3438.
- Csardi, Gabor and Tamas Nepusz (2006). “The igraph software package for complex network research”. *InterJournal Complex Systems*, p. 1695.
- Diraviya Raj, K., G. Mathews, M. Selva Bharath, and J. K. Patterson Edward (2016). “Mass mortality of *Montipora digitata* (Scleractinia) in Vaan Island, Gulf of Mannar, southeast India”. *Current Science* 110.8, pp. 1407–1408.
- Frazier, Monika, Martin Helmkampf, M. Renee Bellinger, Scott M. Geib, and Misaki Takabayashi (2017). “De novo metatranscriptome assembly and coral gene expression profile of *Montipora capitata* with growth anomaly”. *BMC Genomics* 18.1, pp. 1–11. DOI: 10.1186/s12864-017-4090-y.
- Garrett, Peter and Hugh Ducklow (1975). “Coral diseases in Bermuda”. *Nature* 253.5490, pp. 349–350. DOI: 10.1038/253349a0.
- Goreau, Thomas J, James M. Cervino, Maya Goreau, Raymond L Hayes, Marshall Hayes, Laurie L. Richardson, Garriet W. Smith, Kalli DeMeyer, Ivan Nagelkerken, Jaime Garzón-Ferreira, Diego Luis Gil-Agudelo, Ginger Garrison, Ernest H Williams, Lucy Bunkley-Williams, Craig Quirolo, Kathryn L Patterson, and Karen Porter (1998). “Rapid spread of diseases in Caribbean coral reefs”. *Revista de biología tropical* 46.5, pp. 157–171.
- Green, Edmund P and Andrew W Bruckner (2000). “The significance of coral disease epizootiology for coral reef conservation”. *Biological Conservation* 96.3, pp. 347–361. DOI: 10.1016/S0006-3207(00)00073-2.
- Hobbs, Jean-Paul A, Ashley J Frisch, Stephen J. Newman, and Corey B. Wakefield (2015). “Selective Impact of Disease on Coral Communities: Outbreak of White Syndrome Causes Significant Total Mortality of *Acropora* Plate Corals”. *Plos One* 10.7, e0132528. DOI: 10.1371/journal.pone.0132528.

- Kaczmarzsky, Longin T and Laurie L. Richardson (2011). “Do elevated nutrients and organic carbon on Philippine reefs increase the prevalence of coral disease?” *Coral Reefs* 30.1, pp. 253–257. DOI: 10.1007/s00338-010-0686-2.
- Kalinka, Alex T and P. Tomancak (2011). “linkcomm: an R package for the generation, visualization, and analysis of link communities in networks of arbitrary size and type”. *Bioinformatics* 27.14, pp. 2011–2012. DOI: 10.1093/bioinformatics/btr311.
- Kuehl, Kristin, Ross Jones, David Gibbs, and Laurie L. Richardson (2011). “The roles of temperature and light in black band disease (BBD) progression on corals of the genus *Diploria* in Bermuda”. *Journal of Invertebrate Pathology* 106.3, pp. 366–370. DOI: 10.1016/j.jip.2010.12.012.
- Lewis, Cynthia L., Karen L. Neely, Laurie L. Richardson, and Mauricio Rodriguez-Lanetty (2017). “Temporal dynamics of black band disease affecting pillar coral (*Dendrogyra cylindrus*) following two consecutive hyperthermal events on the Florida Reef Tract”. *Coral Reefs*. DOI: 10.1007/s00338-017-1545-1.
- Libro, Silvia, Stefan T. Kaluziak, and Steven V. Vollmer (2013). “RNA-seq profiles of immune related genes in the staghorn coral *Acropora cervicornis* Infected with white band disease”. *PLoS ONE* 8.11, pp. 1–11. DOI: 10.1371/journal.pone.0081821.
- Looney, Erin E, Kathryn Patterson Sutherland, and Erin K Lipp (2010). “Effects of temperature, nutrients, organic matter and coral mucus on the survival of the coral pathogen, *Serratia marcescens* PDL100”. *Environmental Microbiology* 12.9, pp. 2479–2485. DOI: 10.1111/j.1462-2920.2010.02221.x.
- Lortie, Christopher J. (2014). “Formalized synthesis opportunities for ecology: Systematic reviews and meta-analyses”. *Oikos* 123.8, pp. 897–902. DOI: 10.1111/j.1600-0706.2013.00970.x. arXiv: peerj.preprints.270v1 [10.7287].
- Meyer, Julie L, Sarath P Gunasekera, Raymond M Scott, Valerie J Paul, and Max Teplitski (2016). “Microbiome shifts and the inhibition of quorum sensing by Black Band Disease cyanobacteria”. *The ISME Journal* 10.5, pp. 1204–1216. DOI: 10.1038/ismej.2015.184.
- Miller, Aaron W and Laurie L. Richardson (2015). “Emerging coral diseases: a temperature-driven process?” *Marine Ecology* 36.3, pp. 278–291. DOI: 10.1111/maec.12142.
- Morais, Juliano, Aline P.M. Medeiros, and Bráulio A. Santos (2018). “Research gaps of coral ecology in a changing world”. *Marine Environmental Research* 140.June, pp. 243–250. DOI: 10.1016/j.marenvres.2018.06.021.
- Muller, Erinn M, Nicole M Leporacci, Keir J Macartney, Alessandra G Shea, Rachel E. Crane, Emily R Hall, and Kim B. Ritchie (2017). “Low pH reduces the virulence of black band disease on *Orbicella faveolata*”. *PLOS ONE* 12.6. Ed. by Chaolun Allen Chen, e0178869. DOI: 10.1371/journal.pone.0178869.
- Ohniwa, Ryosuke L., Aiko Hibino, and Kunio Takeyasu (2010). “Trends in research foci in life science fields over the last 30 years monitored by emerging topics”. *Scientometrics* 85.1, pp. 111–127. DOI: 10.1007/s11192-010-0252-2.
- Palmer, Caroline V (2018). “Immunity and the coral crisis”. *Communications Biology* 1.1, p. 91.
- Petticrew, M. (2001). “Systematic reviews from astronomy to zoology: myths and misconceptions”. *BMJ* 322.7278, pp. 98–101. DOI: 10.1136/bmj.322.7278.98.
- Precht, William F., Brooke E. Gintert, Martha L. Robbart, Ryan Fura, and Robert van Woesik (2016). “Unprecedented Disease-Related Coral Mortality in Southeastern Florida”. *Scientific Reports* 6, p. 31374. DOI: 10.1038/srep31374.
- R Core team (2016). *R: A language environment for statistical computing*. Vienna, Austria.
- Randall, Carly J and Robert van Woesik (2015). “Contemporary white-band disease in Caribbean corals driven by climate change”. *Nature Climate Change* 5.4, pp. 375–379. DOI: 10.1038/nclimate2530.
- Remily, Elizabeth R and Laurie L. Richardson (2006). “Ecological physiology of a coral pathogen and the coral reef environment”. *Microbial Ecology* 51.3, pp. 345–352. DOI: 10.1007/s00248-006-9029-9.
- Richardson, Laurie L. (1998). “Coral diseases: what is really known?” *Trends in Ecology & Evolution* 13.11, pp. 438–443. DOI: 10.1016/S0169-5347(98)01460-8.



- Rogers, Caroline S and Jeff Miller (2013). “Coral Diseases Cause Reef Decline”. *Science* 340.June, pp. 1522–4. DOI: 10.1126/science.340.6140.1522-a.
- Rosenberg, Eugene and Yael Ben-haim (2002). “Microbial disease of corals and global warming”. *Environmental Microbiology* 4.6, pp. 318–326.
- Santavy, Deborah L and Esther C. Peters (1997). “Microbial pests: coral disease in the western Atlantic”. *Proceedings of the 8th international coral reef symposium*. Panama, pp. 607–6012.
- Sato, Yui, David G. Bourne, and Bette L. Willis (2009). “Dynamics of seasonal outbreaks of black band disease in an assemblage of Montipora species at Pelorus Island (Great Barrier Reef, Australia)”. *Proceedings of the Royal Society B: Biological Sciences* 276.1668, pp. 2795–2803. DOI: 10.1098/rspb.2009.0481.
- (2011). “Effects of temperature and light on the progression of black band disease on the reef coral, Montipora hispida”. *Coral Reefs* 30.3, pp. 753–761. DOI: 10.1007/s00338-011-0751-5.
- Sato, Yui, Michael Civiello, Sara C Bell, Bette L. Willis, and David G. Bourne (2016). “Integrated approach to understanding the onset and pathogenesis of black band disease in corals”. *Environmental Microbiology* 18.3, pp. 752–765. DOI: 10.1111/1462-2920.13122.
- Serrano, M Angeles, Marian Boguna, and Alessandro Vespignani (2009). “Extracting the multiscale backbone of complex weighted networks.” *Proceedings of the National Academy of Sciences of the United States of America* 106.16, pp. 6483–6488. DOI: 10.1073/pnas.0808904106.
- Shizuka, Daizaburo and Damien R. Farine (2016). “Measuring the robustness of network community structure using assortativity”. *Animal Behaviour* 112, pp. 237–246. DOI: 10.1016/j.anbehav.2015.12.007.
- Soffer, Nitzan, Jesse R Zaneveld, and Rebecca Vega-Thurber (2014). “Phage-bacteria network analysis and its implication for the understanding of coral disease”. *Environmental Microbiology*. DOI: 10.1111/1462-2920.12553.
- Spalding, Mark D., Helen E. Fox, Gerald R. Allen, Nick Davidson, Zach A. Ferdaña, Max Finlayson, Benjamin S. Halpern, Miguel A. Jorge, Al Lombana, Sara A. Lourie, Kirsten D. Martin, Edmund McManus, Jennifer Molnar, Cheri A. Recchia, and James Robertson (2007). “Marine Ecoregions of the World: A Bioregionalization of Coastal and Shelf Areas”. *BioScience* 57.7, pp. 573–583. DOI: 10.1641/B570707.
- Stanić, Dina, Stuart Oehrle, Miroslav Gantar, and Laurie L. Richardson (2011). “Microcystin production and ecological physiology of Caribbean black band disease cyanobacteria”. *Environmental Microbiology* 13.4, pp. 900–910. DOI: 10.1111/j.1462-2920.2010.02388.x.
- Sweet, M.J. and Mark T. Bulling (2017). “On the Importance of the Microbiome and Pathobiome in Coral Health and Disease”. *Frontiers in Marine Science* 4. DOI: 10.3389/fmars.2017.00009.
- Vega-Thurber, Rebecca, Deron E Burkepille, Corinne Fuchs, Andrew A Shantz, Ryan McMinds, and Jesse R Zaneveld (2014). “Chronic nutrient enrichment increases prevalence and severity of coral disease and bleaching”. *Global Change Biology* 20.2, pp. 544–554. DOI: 10.1111/gcb.12450.
- Voss, Joshua D and Laurie L. Richardson (2006). “Nutrient enrichment enhances black band disease progression in corals”. *Coral Reefs* 25.4, pp. 569–576. DOI: 10.1007/s00338-006-0131-8.
- Ward, Jessica R. and Kevin D. Lafferty (2004). “The elusive baseline of marine disease: Are diseases in ocean ecosystems increasing?” *PLoS Biology* 2.4, pp. 542–547. DOI: 10.1371/journal.pbio.0020120.
- Weil, Ernesto, Garriet W. Smith, and Diego Luis Gil-Agudelo (2006). “Status and progress in coral reef disease research.” *Diseases of aquatic organisms* 69.1, pp. 1–7. DOI: 10.3354/dao069001.
- Woodley, Cheryl M, Craig A Downs, Andrew W Bruckner, James W Porter, and Sylvia B Galloway, eds. (2015). *Diseases of Coral*. Hoboken, NJ: John Wiley & Sons, Inc. DOI: 10.1002/9781118828502.
- Work, Thierry M. and Carol Meteyer (2014). “To Understand Coral Disease, Look at Coral Cells”. *EcoHealth*. DOI: 10.1007/s10393-014-0931-1.
- Wright, Rachel M, Galina V Aglyamova, Eli Meyer, and Mikhail V Matz (2015). “Gene expression associated with white syndromes in a reef building coral, Acropora hyacinthus”. *BMC Genomics* 16.1, p. 371. DOI: 10.1186/s12864-015-1540-2.

Yang, HongQiang, JianWei Shen, FeiXue Fu, Yue Wang, and Na Zhao (2014). “Black band disease as a possible factor of the coral decline at the northern reef-flat of Yongxing Island, South China Sea”. *Science China Earth Sciences* 57.4, pp. 569–578. DOI: 10.1007/s11430-013-4734-y.
